# Supplementary material
Source: publisher site journal article supplement (https://www.dovepress.com/article/383502)
Supplement: Supplementary file 1 [file get_supplementary_file.php]

| Appendix. List of infusates (irritants/vesicants) in study | | |
| --- | --- | --- |
| Amiodarone |  | Calcium Gluconate in Dextrose |
| Contrast |  | Promethazine |
| Dextrose 50% |  | Promethazine in NaCl |
| Phenylephrine |  | Dextrose 10% |
| Sodium Bicarbonate |  | Norepinephrine |
| Vancomycin |  | Norepinephrine in Dextrose |
| Calcium Gluconate |  | Vasopressin |
